# Supplementary material
Source: PubMed Central journal article supplement (PMC1913888)

# KNRK-ECE-1a-d-GFP+Rab5a-CFP

ECE-1  
-GFP

Rab5a  
-CFP

Merge

ECE-1a

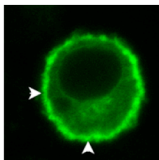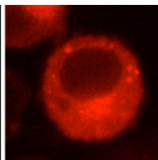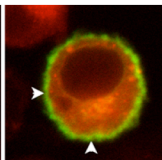

ECE-1b

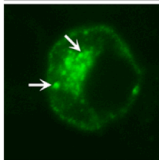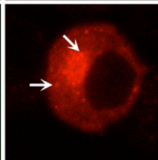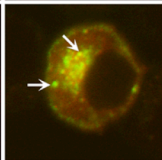

ECE-1c

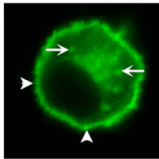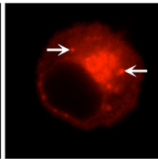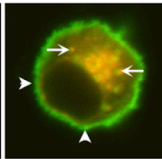

ECE-1d

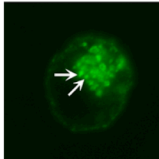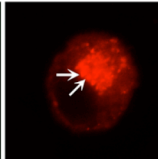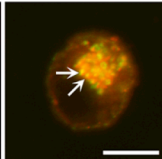

Supplement: pnas_0701910104_1.pdf [file pnas_0701910104_1.pdf]

## A. HEK

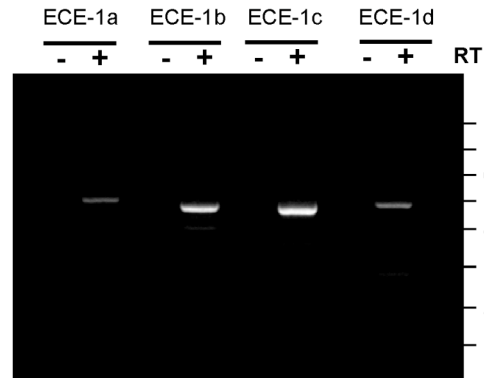

## B. HEK

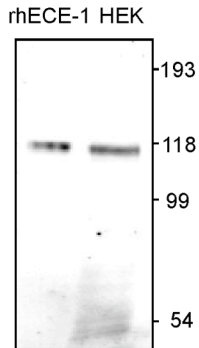

Supplement: pnas_0701910104_2.pdf [file pnas_0701910104_2.pdf]

### A. HEK-NK<sub>1</sub>R (30 min)

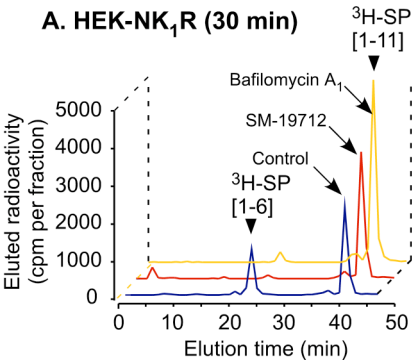

### B. HEK-NK<sub>1</sub>R

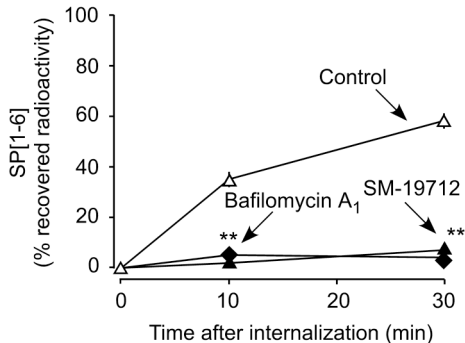

Supplement: pnas_0701910104_4.pdf [file pnas_0701910104_4.pdf]
